# Supplementary material
Source: MDPI journal article supplement (https://www.mdpi.com/2227-9717/10/9/1673)
Supplement: s1 [file s1]

**Table S1.** BIRC3-related genes predicted by on-line servers of GeneMANIA

| Gene   | Description                                             | Rank | Is TF |
|--------|---------------------------------------------------------|------|-------|
| TRAF1  | TNF receptor associated factor 1                        | 1    | No    |
| UBE2D2 | Ubiquitin conjugating enzyme E2 D2                      | 2    | No    |
| TRAF2  | TNF receptor associated factor 2                        | 3    | No    |
| BIRC2  | Baculoviral IAP repeat containing 2                     | 4    | No    |
| DIABLO | Diablo IAP-binding mitochondrial protein                | 5    | No    |
| CASP9  | Caspase 9                                               | 6    | No    |
| CASP7  | Caspase 7                                               | 7    | No    |
| GAS1   | Growth arrest specific 1                                | 8    | Yes   |
| CASP8  | Caspase 8                                               | 9    | No    |
| MALT1  | MALT1 paracaspase                                       | 10   | No    |
| UBE2D3 | Ubiquitin conjugating enzyme E2 D3                      | 11   | No    |
| CASP3  | Caspase 3                                               | 12   | No    |
| USP19  | Ubiquitin specific peptidase 19                         | 13   | No    |
| NFKB1  | Nuclear factor kappa B subunit 1                        | 14   | Yes   |
| TRAF3  | TNF receptor associated factor 3                        | 15   | No    |
| IKBKB  | Inhibitor of nuclear factor kappa B kinase subunit beta | 16   | No    |
| FADD   | Fas associated via death domain                         | 17   | No    |
| PIDD1  | p53-induced death domain protein 1                      | 18   | Yes   |
| SMPD3  | Sphingomyelin phosphodiesterase 3                       | 19   | No    |
| BCL10  | BCL10 immune signaling adaptor                          | 20   | Yes   |
